# Supplementary material for: Lotus Bee Pollen Extract Inhibits Isoproterenol-Induced Hypertrophy via JAK2/STAT3 Signaling Pathway in Rat H9c2 Cells
Source: MDPI journal article supplement (doi:10.3390/antiox12010088), 2022-12-30
Supplement: s1 [file s1]

# Supplementary Information

## UPLC-QTOF MS analysis of LBPE

UPLC analysis was performed on an Agilent 1290 Infinity LC instrument (Agilent, Waldbronn, Germany) which consisted of a binary pump, a diode-array detector, an auto-sampler, and a column compartment. The samples were separated on a Zorbax SB-C<sub>18</sub> column (3.5  $\mu$ m, 100 mm  $\times$  2.1mm i.d.). The mobile phase was 0.1% formic acid aqueous solution (A) and methanol (B) after ultrasonic degassing, and the gradient elution conditions were as follows: 0-3 min: 10% (B); 3-10 min: 10%~65% (B); 10-10.5 min: 65~80% (B); 10.5~15 min: 80% (B). The UV detection wavelength was 254 nm. The column temperature and flow rate were respectively set at 20°C and 0.2 mL/min, with a 1  $\mu$ L volume of injection sample.

UPLC system connected with an Agilent 6530 QTOF mass spectrometer equipped with a dual ESI electrospray ion source. In the mode of (-) ESI, the capillary electrospray pressure was 3.5 kV; nebulizer pressure was 40 psig; drying gas (nitrogen) flow rate at 10.0 L/min; temperature set at 325 °C and OCT 1 RF V<sub>pp</sub> at 750 V. The scanning range was *m/z* 100-1500.

**Table S1** Peak assignments for the analysis of LBPE.

| Peak No. | $t_R$ (min) | Identification                                 | (-) ESI-MS $m/z$ |                            | DBE | Formula                                         |
|----------|-------------|------------------------------------------------|------------------|----------------------------|-----|-------------------------------------------------|
|          |             |                                                | Observed         | Calculated ( $\Delta$ ppm) |     |                                                 |
| 1        | 1.37        | Gluconic acid                                  | 195.05066        | 195.05103 (-1.90)          | 1   | C <sub>6</sub> H <sub>12</sub> O <sub>7</sub>   |
| 2        | 2.23        | Uridine <sup>a</sup>                           | 243.06208        | 243.06226 (-0.74)          | 5   | C <sub>9</sub> H <sub>12</sub> N <sub>2</sub> O |
| 3        | 2.78        | Adenosine <sup>a</sup>                         | 266.08942        | 266.08948 (-0.23)          | 7   | C <sub>10</sub> H <sub>13</sub> N <sub>5</sub>  |
| 4        | 3.48        | Guanosine <sup>a</sup>                         | 282.08431        | 282.08439 (-0.28)          | 7   | C <sub>10</sub> H <sub>13</sub> N <sub>5</sub>  |
| 5        | 11.72       | Isorhamnetin 3-xylosyl-(1→2)-galactopyranoside | 609.14676        | 609.14611 (1.07)           | 13  | C <sub>27</sub> H <sub>30</sub> O <sub>16</sub> |

Note: <sup>a</sup> means compared with standard compounds.
